# Supplementary material for: Tracheal Length Measurement in Intubated Neonates to Guide the Design and Use of Endotracheal Tube Glottic Depth Markings
Source: MDPI journal article supplement (doi:10.3390/children9020169), 2022-01-29

DOI: 10.5281/zenodo.5879916

Cerone, Jennifer B., & Pinheiro, Joaquim M. B. (2021). Tracheal length in intubated neonates - supplemental figures.

Zenodo. <https://doi.org/10.5281/zenodo.5879916>

<https://ZENODO.ORG/RECORD/5879916#.YCOLO2JMLRY>

**SUPPLEMENTAL FIGURE S1:**

Histogram showing the frequency distribution of the carina level, ranging from T3 to T5.5

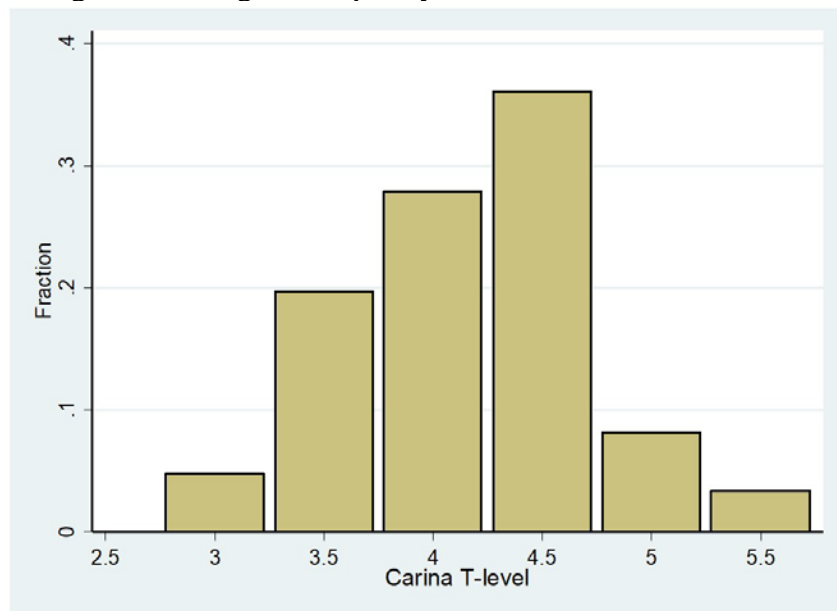

**SUPPLEMENTAL FIGURE S2:**

Carina to mid-tracheal length, assuming that the mid-trachea overlies either the T1 or T1.5 vertebral levels. Dashed line is identity, where mid-tracheal length would equal carina to mid-T1 length, or carina to T1.5 length.

**A) Carina to T1**

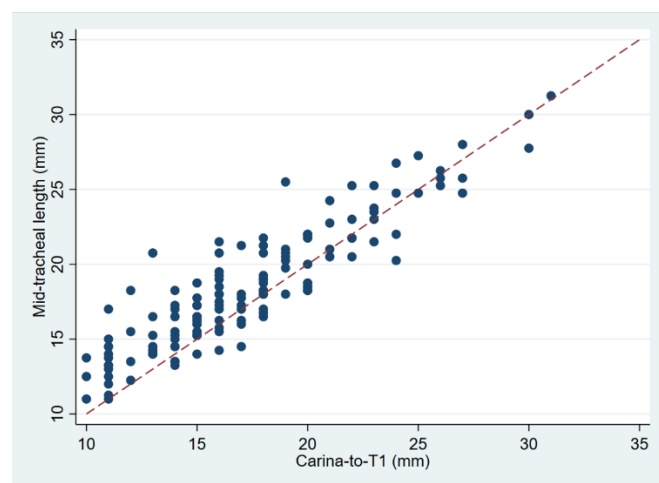

**B) Carina to T1.5**

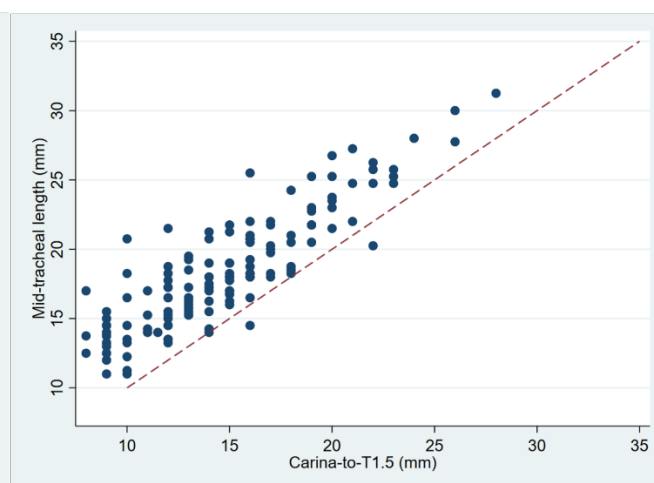

Supplement: s1 [file s1]
